# Supplementary material
Source: PubMed Central journal article supplement (PMC7427501)
Supplement: 41586_2009_BF459927a_MOESM246_ESM.pdf [file 41586_2009_BF459927a_MOESM246_ESM.pdf]

# Unlocking the secrets of the genome

Supplementary information to article doi:459927a

## Full list of modENCODE consortium participants and affiliations.

### *Caenorhabditis elegans*

**Transcripts** (New York University) Marco Mangone<sup>5</sup>, Ting Han<sup>19</sup>, Marlon Stoeckius<sup>20</sup>, Philip MacMenamin<sup>5</sup>, Arun Prasad Manoharan<sup>19</sup>, Jonas Maaskola<sup>20</sup>, Emily Mis<sup>5</sup>, Dongping Wei<sup>19</sup>, Vishal Khivansara<sup>19</sup>, Kevin Chen<sup>5</sup>, Oliver Attie<sup>5</sup>, Wei Chen<sup>21</sup>, Nikolaus Rajewsky<sup>20</sup>, Kristin C. Gunsalus<sup>5</sup>, John Kim<sup>19</sup>, Fabio Piano<sup>5</sup>, (University of Washington, Seattle) LaDeana W. Hillier<sup>18</sup>, Robert H. Waterston (Principal Investigator)<sup>18</sup>, Phil Green<sup>18</sup>, Brent Ewing<sup>18</sup>, David Gordon<sup>18</sup>, Colleen Davis<sup>18</sup>, Michael MacCoss<sup>18</sup>, Daniela Tomazela<sup>18</sup>, Gennifer Merrihew<sup>18</sup>, Barbara Frewen<sup>18</sup>, Jesse Canterbury<sup>18</sup>, Mark B. Gerstein<sup>3,4</sup>, Rajkumar Sasidharan<sup>4</sup>, Ashish Agarwal<sup>4</sup>, Mike Wilson<sup>4</sup>, Guoneng Zhong<sup>4</sup>, Valerie Reinke<sup>22</sup>, Jeanyoung Jo<sup>22</sup>, David M. Miller III<sup>23</sup>, Joseph D. Watson<sup>23</sup>, William C. Spencer<sup>23</sup>, Rebecca D. McWhirter<sup>23</sup>, Stephen E. Von Stetina<sup>23</sup>, Sarah C. Anthony<sup>23</sup>, Frank J. Slack<sup>24</sup>, Masaomi Kato<sup>24</sup>; **Transcription-factor-binding sites** (Yale University) Michael Snyder (Principal Investigator)<sup>14</sup>, Debasish Raha<sup>14</sup>, Mei Zhong<sup>14</sup>, Wei Nui<sup>14</sup>, Valerie Reinke<sup>22</sup>, Judith Janette<sup>22</sup>, Jeanyoung Jo<sup>22</sup>, Mark B. Gerstein<sup>3,4</sup>, Rajkumar Sasidharan<sup>4</sup>, Ashish Agarwal<sup>4</sup>, Mike Wilson<sup>4</sup>, Guoneng Zhong<sup>4</sup>, Stuart K. Kim<sup>25</sup>, Cindie Slightam<sup>25</sup>, Min Jiang<sup>25</sup>, Xiao Xu<sup>25</sup>, Mihail Sarov<sup>26</sup>, A. Francis Stewart<sup>27</sup>, Tony Hyman<sup>26</sup>, Robert H. Waterston<sup>18</sup>, John I. Murray<sup>18</sup>, Elicia A. Preston<sup>18</sup>, Dionne Vafeados<sup>18</sup>; **Chromatin marks** (Fred Hutchinson Cancer Research Center) Steven Henikoff (Principal Investigator)<sup>6</sup>, Kami Ahmad<sup>28</sup>, Siew-Loon Ooi<sup>6</sup>, Akiko Sakai<sup>28</sup>, Jorja G. Henikoff<sup>6</sup>, (The University of North Carolina at Chapel Hill) Jason D. Lieb (Principal Investigator)<sup>11</sup>, Christina M. Whittle<sup>11</sup>, Sevinc Ercan<sup>11</sup>, Kohta Ikegami<sup>11</sup>, Morten B. Jensen<sup>11</sup>, Saianand Balu<sup>11</sup>, Everett Zhou<sup>11</sup>, Jennifer Brennan<sup>11</sup>, Lindsay Dick<sup>11</sup>, Susan Strome<sup>29</sup>, Taryn Phippen<sup>29</sup>, Teruaki Takasaki<sup>29</sup>, Thea Egelhofer<sup>29</sup>, A. Leo Iniguez<sup>30</sup>, Heather Holster<sup>30</sup>, Heidi Rosenbaum<sup>30</sup>, X. Shirley Liu<sup>31</sup>, Tao Liu<sup>31</sup>, Hyunjin Shin<sup>31</sup>, Yong Zhang<sup>31</sup>, Arjun K. Manrai<sup>31</sup>, Zhenhua Wu<sup>31</sup>, Eran Segal<sup>32</sup>, Yaniv Lubling<sup>32</sup>, Noam Kaplan<sup>32</sup>, Yair Field<sup>32</sup>, Abby Dernburg<sup>33</sup>, Hoang Pham<sup>33</sup>, Arshad Desai<sup>34</sup>, Reto Gassman<sup>34</sup>, Karen Yuen<sup>34</sup>, Julie Ahinger<sup>35</sup>, Anne Canonge<sup>35</sup>, Paulina Kolasinska-Zwierz<sup>35</sup>, Isabel Latorre<sup>35</sup>

### *Drosophila melanogaster*

**Transcripts** (Lawrence Berkeley National Laboratory) Angela N. Brooks<sup>36</sup>, Kasper D. Hansen<sup>37</sup>, Sandrine Dudoit<sup>37,38</sup>, Steven E. Brenner<sup>36,39</sup>, Roger Hoskins<sup>1</sup>, Ann S. Hammonds<sup>1</sup>, Joseph W. Carlson<sup>1</sup>, Jane Landolin<sup>1</sup>, Kenneth H. Wan<sup>1</sup>, Charles Yu<sup>1</sup>, Benjamin Booth<sup>1</sup>, Susan E. Celniker (Principal Investigator)<sup>1</sup>, Peter Cherbas<sup>40,41</sup>, Justen Andrews<sup>40</sup>, Lucy Cherbas<sup>40,41</sup>, Dayu Zhang<sup>40</sup>, David Miller<sup>40</sup>, Andreas Rechsteiner<sup>41</sup>, Thomas C. Kaufman<sup>40</sup>, Justin P. Kumar<sup>40</sup>, Laura Langton<sup>42</sup>, Marijke J. van Baren<sup>42</sup>, Aaron E. Tenney<sup>42</sup>, Charles L. G. Comstock<sup>42</sup>, Michael Brent<sup>42</sup>, Aaron T. Willingham<sup>43</sup>, Philipp Kapranov<sup>43</sup>, Srinika Ghosh<sup>43</sup>, Alex Dobin<sup>44</sup>, Christopher P. Zalski<sup>44</sup>, Wei Lin<sup>44</sup>, Carrie A. Davis<sup>44</sup>, Thomas R. Gingeras<sup>43,44</sup>, Michael O. Duff<sup>45</sup>, Li Yang<sup>45</sup>, Brenton R. Graveley<sup>45</sup>, Norbert Perrimon<sup>46,47</sup>, Stephanie Mohr<sup>46</sup>, Bernard Mathey-Prevot<sup>46</sup>, (Memorial Sloan-Kettering Cancer Center) Eric C. Lai<sup>10</sup>, Wei-Jen Chung<sup>10</sup>, Raquel Martin<sup>10</sup>, Gregory J. Hannon<sup>48</sup>, Michelle Rooks<sup>48</sup>, Eugene Berezikov<sup>49</sup>, Martin Hirst<sup>50</sup>, Marco Marra<sup>50</sup>, Yongjun Zhao<sup>50</sup>, Thomas Zeng<sup>50</sup>; **Transcription-factor-binding sites** (University of Chicago) Richard P. Auburn<sup>51</sup>, Hugo J. Bellen<sup>52</sup>, Chris Bristow<sup>9</sup>, Christopher D. Brown<sup>16</sup>, Jia Chen<sup>53</sup>, Keith Ching<sup>54</sup>, Marc H. Domanus<sup>17</sup>, Lee Edsall<sup>54</sup>, Robert Grossman<sup>53</sup>, Jason Ernst<sup>8,9</sup>, David Hanley<sup>53</sup>, Elizabeth Heinz<sup>17</sup>, Roger Hoskins<sup>1</sup>, Haruhiko Ishii<sup>55</sup>, Manolis Kellis<sup>8,9</sup>, Pouya Kheradpour<sup>9</sup>, Zirong Li<sup>55</sup>, Michael F. Lin<sup>8,9</sup>, Xiangjun Liu<sup>53,56</sup>, Folker Meyer<sup>57,58</sup>, Steven W. Miller<sup>59</sup>, Carolyn A. Morrison<sup>16</sup>, Nicolas Negre<sup>16</sup>, James W. Posakony<sup>59</sup>, Bing Ren<sup>60</sup>, Steven Russell<sup>51</sup>, Douglas A. Scheftner<sup>16</sup>, Rachel Sealon<sup>9</sup>, Lionel Senderowicz<sup>16</sup>, Parantu K. Shah<sup>16</sup>, Rebecca F. Spokony<sup>16</sup>, Alexander Stark<sup>8,9</sup>, Feng Tian<sup>53,56</sup>, Koen J.T. Venken<sup>61</sup>, Ulrich Wagner<sup>54</sup>, Kevin P. White (Principal Investigator)<sup>16,17</sup>, Robert White<sup>62</sup>, Jared Wilkening<sup>58</sup>, Wenjun Wu<sup>58</sup>, Zhen Ye<sup>54</sup>, Sui Zhang<sup>59</sup>, Yizhong Zhang<sup>17</sup>; **Chromatin marks** (Fred Hutchinson Cancer Research Center) Steven Henikoff (Principal Investigator)<sup>6</sup>, Kami Ahmad<sup>28</sup>, Siew-Loon Ooi<sup>6</sup>, Akiko Sakai<sup>28</sup>, Jorja G. Henikoff<sup>6</sup> (Lawrence Berkeley National Laboratory) Gary H. Karpen<sup>7</sup>, Sarah C. R. Elgin<sup>63</sup>, Mitzi I. Kuroda<sup>64</sup>, Peter J. Park<sup>65-67</sup>, Vincenzo Pirrotta<sup>68</sup>, Artyom A. Alekseyenko<sup>64</sup>, Andrey A. Gorchakov<sup>64</sup>, Cameron Kennedy<sup>7</sup>, Peter V. Kharchenko<sup>65,66</sup>, Ok-Kyung Lee<sup>64</sup>, Sarah E. Marchetti<sup>63</sup>, Aki Minoda<sup>7</sup>, Shouyong Peng<sup>66</sup>, Nicole C Riddle<sup>63</sup>, Yuri B. Schwartz<sup>68</sup>, Gregory Shanower<sup>68</sup>, Michael Y. Tolstorukov<sup>66</sup>; **DNA replication** (Duke University) David M. MacAlpine (Principal Investigator)<sup>12</sup>, Leyna C. DeNapoli<sup>12</sup>, Matthew L. Eaton<sup>12</sup>, Heather K. MacAlpine<sup>12</sup>, Queying Ding<sup>12</sup>, Thomas Eng<sup>69</sup>, Helena Kashevsky<sup>69</sup>, Noa Sher<sup>69</sup>, Terry L. Orr-Weaver<sup>69</sup>

**Data Coordination Center** (Cold Spring Harbor Laboratory) Galt Barber<sup>70</sup>, Sergio Contrino<sup>13</sup>, Francois Guillier<sup>13</sup>, Angie Hinrichs<sup>70</sup>, W. James Kent<sup>70</sup>, Suzanna Lewis<sup>71</sup>, Sheldon McKay<sup>15</sup>, Gos Micklem<sup>13</sup>, Christopher J. Mungall<sup>71</sup>, Kate Rosenbloom<sup>70</sup>, Kim Rutherford<sup>13</sup>, Richard Smith<sup>13</sup>, Lincoln Stein (Principal Investigator)<sup>15</sup>, E. O. Stinson<sup>71</sup>, Nicole L. Washington<sup>71</sup>, Zheng Zha<sup>15</sup>

**modENCODE project scientific management** Francis S. Collins<sup>72</sup>, Laura A. L. Dillon<sup>2</sup>, Elise A. Feingold<sup>2</sup>, Peter J. Good<sup>2</sup>, Mark S. Guyer<sup>2</sup>

### Affiliations

<sup>1</sup>Department of Genome Biology, Lawrence Berkeley National Laboratory, Berkeley, California 94720, USA. <sup>2</sup>Division of Extramural Research, National Human Genome Research Institute, National Institutes of Health, 5635 Fishers Lane, Suite 4076, Bethesda, Maryland 20892, USA. <sup>3</sup>Program in Computational Biology and Bioinformatics, Yale University, Bass 432, 266 Whitney Avenue, New Haven, Connecticut 06520, USA; Department of Computer Science, Yale University, Bass 432, 266 Whitney Avenue, New Haven, Connecticut 06520, USA. <sup>4</sup>Department of Molecular Biophysics and Biochemistry, Yale University, Bass 432, 266 Whitney Avenue, New Haven, Connecticut 06520, USA. <sup>5</sup>Center for Genomics and Systems Biology, Department of Biology, New York University, 1009 Silver Center, 100 Washington Square East, New York, New York 10003, USA. <sup>6</sup>Basic Sciences Division, Fred Hutchinson Cancer Research Center, 1100 Fairview Avenue North, Seattle, Washington 98109, USA. <sup>7</sup>Department of Genome and Computational Biology, Lawrence Berkeley National Laboratory, Department of Molecular and Cell Biology, University of California, Berkeley, One Cyclotron Road, Berkeley,

California 94720, USA. <sup>8</sup>Broad Institute, Massachusetts Institute of Technology and Harvard University, Cambridge, Massachusetts 02140, USA. <sup>9</sup>Computer Science and Artificial Intelligence Laboratory, Massachusetts Institute of Technology, Cambridge, Massachusetts 02139, USA. <sup>10</sup>Sloan-Kettering Institute, 1275 York Avenue, Box 252, New York, New York 10065, USA. <sup>11</sup>Department of Biology and Carolina Center for Genome Sciences, University of North Carolina at Chapel Hill, Chapel Hill, North Carolina 27599, USA. <sup>12</sup>Department of Pharmacology and Cancer Biology, Duke University Medical Center, Durham, North Carolina 27710, USA. <sup>13</sup>Department of Genetics, University of Cambridge, CB2 3EH, UK; Cambridge Systems Biology Centre, Tennis Court Road, Cambridge CB2 1QR, UK. <sup>14</sup>Department of Molecular, Cellular and Developmental Biology, Yale University, New Haven, Connecticut 06824, USA. <sup>15</sup>Cold Spring Harbor Laboratory, 1 Bungtown Road, Cold Spring Harbor, New York 11724, USA. <sup>16</sup>Institute for Genomics & Systems Biology, Department of Human Genetics, University of Chicago, 920 E. 58th Street, Chicago, Illinois 60637, USA. <sup>17</sup>Institute for Genomics & Systems Biology, Argonne National Laboratory, 9700 South Cass Avenue, Argonne, Illinois 60439, USA. <sup>18</sup>Department of Genome Sciences and University of Washington School of Medicine, William H. Foege Bldg., 1705 N.E. Pacific Street, Seattle, Washington 98195-5065, USA. <sup>19</sup>Life Sciences Institute, Department of Human Genetics, University of Michigan, 210 Washtenaw Avenue, Ann Arbor, Michigan 48109, USA. <sup>20</sup>Max-Delbrück-Centrum für Molekulare Medizin (MDC), Systems Biology, Berlin-Buch, Robert-Rössle-Str. 10, 13092 Berlin, Germany. <sup>21</sup>Department of Human Molecular Genetics, Max Planck Institute for Molecular Genetics, Ihnestrasse 73, D-14195 Berlin, Germany. <sup>22</sup>Department of Genetics, Yale University School of Medicine, New Haven, Connecticut 06520, USA. <sup>23</sup>Department of Cell and Developmental Biology, Vanderbilt University, 465 21st Avenue South, Nashville, Tennessee 37232, USA. <sup>24</sup>Department of Molecular, Cellular and Developmental Biology, PO Box 208103, Yale University, New Haven, Connecticut 06520, USA. <sup>25</sup>Stanford University Medical Center, Department of Developmental Biology, 279 Campus Drive, Stanford, California 94305, USA. <sup>26</sup>Max Planck Institute of Molecular Cell Biology and Genetics, Proteinhauerstrasse 108, 01307 Dresden, Germany. <sup>27</sup>Technical University Dresden, BiolInnovations Centre, Genomics Department, Tatzberg 47, 01307 Dresden, Germany. <sup>28</sup>Department of Biological Chemistry and Molecular Pharmacology, Harvard Medical School, 240 Longwood Avenue, Boston, Massachusetts 02115, USA. <sup>29</sup>Molecular, Cell, and Developmental Biology, Sinshheimer Labs, University of California, Santa Cruz, 1156 High Street, Santa Cruz, California 95064, USA. <sup>30</sup>Roche NimbleGen, Inc., 500 South Rosa Road, Madison, Wisconsin 53719, USA. <sup>31</sup>Department of Biostatistics and Computational Biology, Dana-Farber Cancer Institute, Harvard School of Public Health, 44 Binney Street, Boston, Massachusetts 02115, USA. <sup>32</sup>Department of Computer Science and Applied Mathematics, Weizmann Institute of Science, Rehovot, 76100, Israel. <sup>33</sup>Life Sciences Division, Lawrence Berkeley National Laboratory and Department of Molecular and Cell Biology, University of California, Berkeley, Berkeley, California 94720, USA. <sup>34</sup>Ludwig Institute for Cancer Research & Department of Cellular and Molecular Medicine, University of California, San Diego, 9500 Gilman Drive, MC 0653, La Jolla, California 92093, USA. <sup>35</sup>Wellcome Trust/Cancer Research UK Gurdon Institute, University of Cambridge, Tennis Court Road, Cambridge CB2 1QN, UK. <sup>36</sup>Department of Molecular and Cell Biology, University of California, Berkeley, California 94720, USA. <sup>37</sup>Division of Biostatistics, School of Public Health, University of California, Berkeley, California 94720, USA. <sup>38</sup>Department of Statistics, University of California, Berkeley, California 94720, USA. <sup>39</sup>Department of Plant & Microbial Biology, University of California, Berkeley, California 94720, USA. <sup>40</sup>Department of Biology, Indiana University, 1001 E. 3rd Street, Bloomington, Indiana 47405-7005, USA. <sup>41</sup>Center for Genomics and Bioinformatics, Indiana University, 1001 E. 3rd Street, Bloomington, Indiana 47405-7005, USA. <sup>42</sup>Center for Genome Sciences, Washington University, 4444 Forest Park Boulevard, Saint Louis, Missouri 63108, USA. <sup>43</sup>Affymetrix Inc, Santa Clara, California 95051, USA. <sup>44</sup>Cold Spring Harbor Laboratory, Cold Spring Harbor, New York 11724, USA. <sup>45</sup>Department of Genetics and Developmental Biology, University of Connecticut Health Center, 263 Farmington, Connecticut 06030-3301, USA. <sup>46</sup>Department of Genetics and Drosophila RNAi Screening Center, Harvard Medical School, 77 Avenue Louis Pasteur, Boston, Massachusetts 02115, USA. <sup>47</sup>Howard Hughes Medical Institute, Harvard Medical School, 77 Avenue Louis Pasteur, Boston, Massachusetts 02115, USA. <sup>48</sup>Cold Spring Harbor Laboratory, Watson School of Biological Sciences and Howard Hughes Medical Institute, 1 Bungtown Road, Cold Spring Harbor, New York 11724, USA. <sup>49</sup>Hubrecht Institute, Uppsalalaan 8, 3584 CT Utrecht, The Netherlands. <sup>50</sup>BC Cancer Agency Genome Sciences Centre, 570 West 7th Avenue, Vancouver, British Columbia V5Z 4S6, Canada. <sup>51</sup>Department of Genetics and Cambridge Systems Biology Centre, University of Cambridge, Downing Street, Cambridge, CB2 3EH, UK. <sup>52</sup>Department of Molecular and Human Genetics, Howard Hughes Medical Institute, Baylor College of Medicine, One Baylor Plaza, Houston, Texas 77030, USA. <sup>53</sup>National Center for Data Mining, University of Illinois at Chicago, 700 Science and Engineering Offices, MC 249, 851 South Morgan Street, Chicago, Illinois 60607, USA. <sup>54</sup>Ludwig Institute for Cancer Research, 9500 Gilman Drive, La Jolla, California 92093, USA. <sup>55</sup>Ludwig Institute for Cancer Research, University of California San Diego Biology Division, 59500 Gilman Drive, La Jolla, California 92093-0653, USA. <sup>56</sup>Institute of Biomedical Informatics, School of Medical Sciences, Tsinghua University, Beijing, China 100084. <sup>57</sup>Mathematics and Computer Science Division, Argonne National Laboratory, 9700 South Cass Avenue, MCS/221, Argonne, Illinois 60439, USA. <sup>58</sup>University of Chicago, Computation Institute, Research Institute Suite 405, 5640 South Ellis Avenue, Chicago, Illinois 60637, USA. <sup>59</sup>Division of Biological Sciences, Section of Cell & Developmental Biology, University of California San Diego, 9500 Gilman Drive, La Jolla, California 92093, USA. <sup>60</sup>Ludwig Institute for Cancer Research, University of California San Diego School of Medicine, Department of Cellular and Molecular Medicine, University of California San Diego Moores Cancer Center, 59500 Gilman Drive, La Jolla, California 92093, USA. <sup>61</sup>Department of Molecular and Human Genetics, Baylor College of Medicine, One Baylor Plaza, Houston, Texas 77030, USA. <sup>62</sup>Department of Physiology, Development and Neuroscience, University of Cambridge, Downing Street, Cambridge CB2 3DY, UK. <sup>63</sup>Department of Biology CB-1137, Washington University, Saint Louis, Missouri 63130, USA. <sup>64</sup>Harvard-Partners Center for Genetics & Genomics, Brigham & Women's Hospital, Department of Genetics, Harvard Medical School, 77 Avenue Louis Pasteur, Boston, Massachusetts 02115, USA. <sup>65</sup>Children's Hospital Informatics Program, Harvard-Massachusetts Institute of Technology Division of Health Sciences and Technology, 300 Longwood Ave, Boston, Massachusetts 02115, USA. <sup>66</sup>Harvard-Partners Center for Genetics and Genomics, New Research Building Rm 250, 77 Avenue Louis Pasteur, Boston, Massachusetts 02115, USA. <sup>67</sup>Center for Biomedical Informatics, Harvard Medical School, 10 Shattuck St Boston, Massachusetts 02115, USA. <sup>68</sup>Department of Molecular Biology and Biochemistry, Rutgers University, Piscataway, New Jersey 08854, USA. <sup>69</sup>Department of Biology, Whitehead Institute, Massachusetts Institute of Technology, Cambridge, Massachusetts 02142, USA. <sup>70</sup>Department of Biomolecular Engineering, University of California, Santa Cruz, California 95064, USA. <sup>71</sup>Life Sciences Division, Lawrence Berkeley National Laboratory, 1 Cyclotron Road, Mailstop 64-121, Berkeley, California 94720, USA. <sup>72</sup>Office of the Director, National Human Genome Research Institute, National Institutes of Health, 31 Center Drive, Suite 4B09, Bethesda, Maryland 20892, USA.
